# Supplementary material for: Metabolic and behavioral effects of mutant huntingtin deletion in Sim1 neurons in the BACHD mouse model of Huntington’s disease
Source: PubMed Central journal article supplement (PMC4917832; doi:10.1038/srep28322), 2016-06-23
Supplement: srep28322-s1.pdf [file srep28322-s1.pdf]

**Metabolic and behavioral effects of mutant huntingtin deletion in  
Sim1 neurons in the BACHD mouse model of Huntington's disease**

Rana Soylu-Kucharz<sup>1\*</sup>, Barbara Baldo<sup>1</sup> and Åsa Petersén<sup>1</sup>

1. Translational Neuroendocrine Research Unit, Department of Experimental Medical  
Science, Lund University, BMC D11, SE-22184 Lund, Sweden

Supplementary Figure 1: Numbers of oxytocin and vasopressin positive neurons in the PVN.

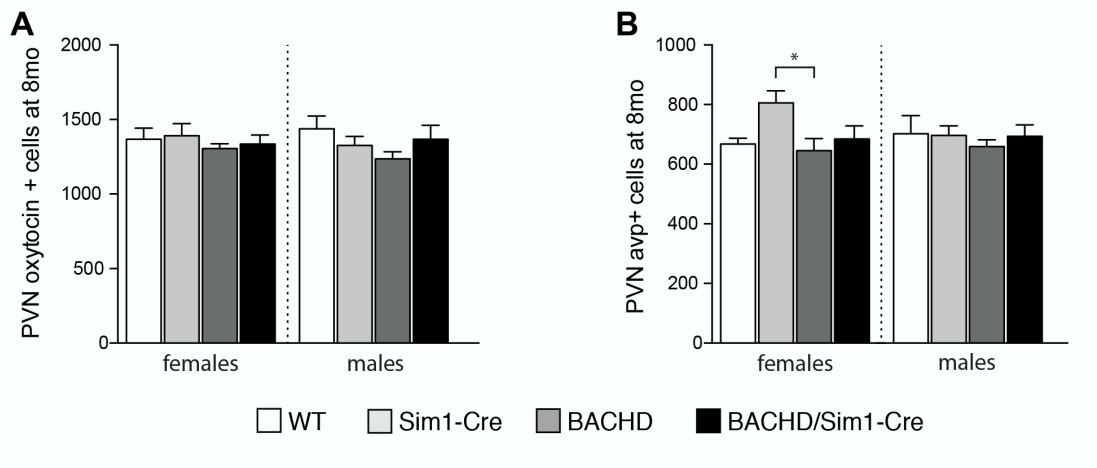

**Supplemental Figure 1: Numbers of oxytocin and vasopressin positive neurons in**

**the PVN. (A)** Stereological assessment of PVN oxytocin positive cells showed no

difference between any of the groups or sex (Females: n=4/group, Males: n=4-

7/group, Kruskal-Wallis test followed by Dunn's multiple comparison test). **(B)**

Sim1-Cre females showed significantly increased number of vasopressin positive

cells in the PVN compared to BACHD females (Females: n=4/group, Males: n=4-

7/group, Kruskal-Wallis test followed by Dunn's multiple comparison test). Data are

expressed as mean±SEM. \*p<0.05

## Supplementary Statistical Results

The data was tested for normal distribution using a Kolmogorov–Smirnov test.  $p < 0.05$  was considered statistically significant and statistical analyses were performed using Prism 6 software (GraphPad). M: mean, SD: standard deviation.

### Figure 2: Sim1-Cre X BACHD metabolic phenotype.

#### A. Females body weight measurement at 2 months

Kruskal-Wallis test:  $p < 0.0001$

WT: M=22.04, SD=1.968, n=26

Sim1-Cre: M=22.07, SD=2.099, n=14

BACHD: M=28.22, SD=4.6, n=15

BACHD/Sim1-Cre: M=27.23, SD=3.319, n=22

Dunn's multiple comparisons test:

WT vs. Sim1-Cre:  $p > 0.9999$

WT vs. BACHD:  $p < 0.0001$

WT vs. BACHD/Sim1-Cre:  $p < 0.0001$

Sim1-Cre vs. BACHD:  $p = 0.0002$

Sim1-Cre vs. BACHD/Sim1-Cre:  $p < 0.0001$

BACHD vs. BACHD/Sim1-Cre:  $p > 0.9999$

#### B. Males body weight measurement at 2 months

One-way ANOVA,  $F(3, 93) = 7.005$ .  $p = 0.0003$

WT: M=25.63, SD=3.491, n=26

Sim1-Cre: M=24.43, SD=3.05, n=21

BACHD: M=28.86, SD=1.451, n=27

BACHD/Sim1-Cre: M=27.22, SD=3.778, n=33

Tukey's multiple comparisons test:

WT vs. Sim1-Cre:  $p = 0.5892$

WT vs. BACHD:  $p = 0.0103$

WT vs. BACHD/Sim1-Cre:  $p = 0.2512$

Sim1-Cre vs. BACHD:  $p = 0.0004$

Sim1-Cre vs. BACHD/Sim1-Cre:  $p = 0.0144$

BACHD vs. BACHD/Sim1-Cre:  $p = 0.3308$

#### B. Females body weight measurement at 8 months

Kruskal-Wallis test:  $p < 0.0001$   
WT: M=30.14, SD=8.39, n=28  
Sim1-Cre: M=29.45, SD=6.89, n=30  
BACHD: M=45, SD=9.59, n=29  
BACHD/Sim1-Cre: M=46.27, SD=7.62, n=36

Dunn's multiple comparisons test:  
WT vs. Sim1-Cre:  $p > 0.9999$   
WT vs. BACHD:  $p = 0.0001$   
WT vs. BACHD/Sim1-Cre:  $p < 0.0001$   
Sim1-Cre vs. BACHD:  $p < 0.0001$   
Sim1-Cre vs. BACHD/Sim1-Cre:  $p < 0.0001$   
BACHD vs. BACHD/Sim1-Cre:  $p > 0.9999$

#### **B. Males body weight measurement at 8 months**

Kruskal-Wallis test:  $p = 0.0007$   
WT: M=35.8, SD=7.836, n=24  
Sim1-Cre: M=34.65, SD=7.037, n=20  
BACHD: M=45.57, SD=5.951, n=13  
BACHD/Sim1-Cre: M=39.58, SD=7.883, n=25

Dunn's multiple comparisons test:  
WT vs. Sim1-Cre:  $p > 0.9999$   
WT vs. BACHD:  $p = 0.0033$   
WT vs. BACHD/Sim1-Cre:  $p = 0.5416$   
Sim1-Cre vs. BACHD:  $p = 0.0013$   
Sim1-Cre vs. BACHD/Sim1-Cre:  $p = 0.2438$   
BACHD vs. BACHD/Sim1-Cre:  $p = 0.2351$

#### **C. Females DEXA scan measurement at 8 months.**

Kruskal-Wallis test:  $p < 0.0001$   
WT: M=20.46, SD=3.77, n=19  
Sim1-Cre: M=23.81, SD=6.595, n=13  
BACHD: M=41.78, SD=10.79, n=14  
BACHD/Sim1-Cre: M=42.99, SD=11.41, n=18

Dunn's multiple comparisons test:  
WT vs. Sim1-Cre:  $p > 0.9999$   
WT vs. BACHD:  $p = 0.0001$   
WT vs. BACHD/Sim1-Cre:  $p < 0.0001$   
Sim1-Cre vs. BACHD:  $p = 0.0051$   
Sim1-Cre vs. BACHD/Sim1-Cre:  $p = 0.0016$   
BACHD vs. BACHD/Sim1-Cre:  $p > 0.9999$

**C. Males DEXA scan measurement at 8 months.**

Kruskal-Wallis test:  $p=0.0017$

WT:  $M=20.93$ ,  $SD=7.351$ ,  $n=24$

Sim1-Cre:  $M=20.94$ ,  $SD=6.663$ ,  $n=24$

BACHD:  $M=29.15$ ,  $SD=5.462$ ,  $n=16$

BACHD/Sim1-Cre:  $M=24.74$ ,  $SD=7.303$ ,  $n=25$

Dunn's multiple comparisons test:

WT vs. Sim1-Cre:  $p> 0.9999$

WT vs. BACHD:  $p=0.0041$

WT vs. BACHD/Sim1-Cre:  $p=0.3013$

Sim1-Cre vs. BACHD:  $p=0.007$

Sim1-Cre vs. BACHD/Sim1-Cre:  $p=0.4445$

BACHD vs. BACHD/Sim1-Cre:  $p=0.5597$

**D. Females serum leptin measurement at 8 months.**

One-way ANOVA,  $F(3, 30) = 11.60$ ,  $p< 0.0001$

WT:  $M=6.306$ ,  $SD=6.047$ ,  $n=8$

Sim1-Cre:  $M=6.05$ ,  $SD=4.086$ ,  $n=8$

BACHD:  $M=38.46$ ,  $SD=20.72$ ,  $n=9$

BACHD/Sim1-Cre:  $M=33.12$ ,  $SD=18.4$ ,  $n=9$

Tukey's multiple comparisons test:

WT vs. Sim1-Cre:  $p> 0.9999$

WT vs. BACHD:  $p=0.0005$

WT vs. BACHD/Sim1-Cre:  $p=0.004$

Sim1-Cre vs. BACHD:  $p=0.0005$

Sim1-Cre vs. BACHD/Sim1-Cre:  $p=0.0037$

BACHD vs. BACHD/Sim1-Cre:  $p=0.8679$

**D. Males serum leptin measurement at 8 months.**

Kruskal-Wallis test:  $p=0.0259$

WT:  $M=2.859$ ,  $SD=2.835$ ,  $n=8$

Sim1-Cre:  $M=5.003$ ,  $SD=6.3$ ,  $n=8$

BACHD:  $M=14.61$ ,  $SD=9.748$ ,  $n=11$

BACHD/Sim1-Cre:  $M=5.962$ ,  $SD=7.724$ ,  $n=13$

Dunn's multiple comparisons test:

WT vs. Sim1-Cre:  $p> 0.9999$

WT vs. BACHD:  $p=0.0317$

WT vs. BACHD/Sim1-Cre:  $p> 0.9999$

Sim1-Cre vs. BACHD:  $p=0.1427$

Sim1-Cre vs. BACHD/Sim1-Cre:  $p=> 0.9999$

BACHD vs. BACHD/Sim1-Cre:  $p=0.364$

**E. Females locomotor activity measurement at 2 months.**

Kruskal-Wallis test:  $p=0.3656$

WT: M=5205, SD=2147, n=24

Sim1-Cre: M=6496, SD=3105, n=16

BACHD: M=5047, SD=1594, n=16

BACHD/Sim1-Cre: M=6059, SD=3045, n=21

Dunn's multiple comparisons test:

WT vs. Sim1-Cre:  $p=0.5882$

WT vs. BACHD:  $p> 0.9999$

WT vs. BACHD/Sim1-Cre:  $p> 0.9999$

Sim1-Cre vs. BACHD:  $p> 0.9999$

Sim1-Cre vs. BACHD/Sim1-Cre:  $p> 0.9999$

BACHD vs. BACHD/Sim1-Cre:  $p> 0.9999$

**E. Males locomotor activity measurement at 2 months.**

Kruskal-Wallis test:  $p=0.0097$

WT: M=5281, SD=2039, n=26

Sim1-Cre: M=5109, SD=1654, n=22

BACHD: M=6346, SD=1505, n=14

BACHD/Sim1-Cre: M=7678, SD=3947, n=23

Dunn's multiple comparisons test:

WT vs. Sim1-Cre:  $p> 0.9999$

WT vs. BACHD:  $p=0.2212$

WT vs. BACHD/Sim1-Cre:  $p=0.0285$

Sim1-Cre vs. BACHD:  $p=0.4101$

Sim1-Cre vs. BACHD/Sim1-Cre:  $p=0.0789$

BACHD vs. BACHD/Sim1-Cre:  $p> 0.9999$

**F. Females locomotor activity measurement at 8 months.**

Kruskal-Wallis test:  $p=0.8875$

WT: M=8022, SD=4235, n=16

Sim1-Cre: M=7654, SD=4050, n=9

BACHD: M=8384, SD=8284, n=12

BACHD/Sim1-Cre: M=8089, SD=5602, n=15

Dunn's multiple comparisons test:

WT vs. Sim1-Cre:  $p> 0.9999$

WT vs. BACHD:  $p> 0.9999$

WT vs. BACHD/Sim1-Cre:  $p > 0.9999$   
Sim1-Cre vs. BACHD:  $p > 0.9999$   
Sim1-Cre vs. BACHD/Sim1-Cre:  $p > 0.9999$   
BACHD vs. BACHD/Sim1-Cre:  $p > 0.9999$

**F. Males locomotor activity measurement at 8 months.**

Kruskal-Wallis test:  $p=0.2485$   
WT: M=6350, SD=3337, n=21  
Sim1-Cre: M=6496, SD=1913, n=19  
BACHD: M=5814, SD=2332, n=11  
BACHD/Sim1-Cre: M=8576, SD=5205, n=20

Dunn's multiple comparisons test:  
WT vs. Sim1-Cre:  $p > 0.9999$   
WT vs. BACHD:  $p > 0.9999$   
WT vs. BACHD/Sim1-Cre:  $p > 0.9999$   
Sim1-Cre vs. BACHD:  $p=0.802$   
Sim1-Cre vs. BACHD/Sim1-Cre:  $p > 0.9999$   
BACHD vs. BACHD/Sim1-Cre:  $p=0.463$

**Figure 3:** Evaluation of depressive and anxiety-like behavior using Porsolt forced swim and elevated plus maze tests.

**A. Females time spent immobile (s) in FST at 2 months.**

One-way ANOVA,  $F(3, 60) = 6.695$ ,  $p = 0.0006$   
WT: M=74.73, SD=46.7, n=22  
Sim1-Cre: M=96.4, SD=47.3, n=10  
BACHD: M=116.3, SD=58.13, n=15  
BACHD/Sim1-Cre: M=146.4, SD=50.84, n=17

Tukey's multiple comparisons test:  
WT vs. Sim1-Cre:  $p=0.679$   
WT vs. BACHD:  $p=0.079$   
WT vs. BACHD/Sim1-Cre:  $p=0.0003$   
Sim1-Cre vs. BACHD:  $p=0.7714$   
Sim1-Cre vs. BACHD/Sim1-Cre:  $p=0.0747$   
BACHD vs. BACHD/Sim1-Cre:  $p=0.3469$

**A. Males time spent immobile (s) in FST at 2 months**

One-way ANOVA,  $F(3, 51) = 0.1896$ ,  $p = 0.09030$   
WT: M=75.06, SD=52.24, n=18

Sim1-Cre: M=80.93, SD=40.12, n=14  
BACHD: M=62, SD=55.15, n=6  
BACHD/Sim1-Cre: M=76.76, SD=58.71, n=17

Tukey's multiple comparisons test:  
WT vs. Sim1-Cre: p=0.9888  
WT vs. BACHD: p=0.9506  
WT vs. BACHD/Sim1-Cre: p=0.9997  
Sim1-Cre vs. BACHD: p=0.8777  
Sim1-Cre vs. BACHD/Sim1-Cre: p=0.9961  
BACHD vs. BACHD/Sim1-Cre: p=0.9321

**B. Females time spent immobile (s) in FST at 8 months.**

One-way ANOVA,  $F(3, 63) = 4.984$ ,  $p = 0.0036$   
WT: M=94.06, SD=52.49, n=16  
Sim1-Cre: M=82.31, SD=64.75, n=16  
BACHD: M=129.2, SD=53.49, n=15  
BACHD/Sim1-Cre: M=145.2, SD=49.63, n=20

Tukey's multiple comparisons test:  
WT vs. Sim1-Cre: p=0.9306  
WT vs. BACHD: p=0.2947  
WT vs. BACHD/Sim1-Cre: p=0.0362  
Sim1-Cre vs. BACHD: p=0.0937  
Sim1-Cre vs. BACHD/Sim1-Cre: p=0.0062  
BACHD vs. BACHD/Sim1-Cre: p=0.83

**B. Males time spent immobile (s) in FST at 8 months.**

Kruskal-Wallis test: p=0.0007  
WT: M=45.36, SD=49.97, n=25  
Sim1-Cre: M=59.88, SD=48.44, n=25  
BACHD: M=107.2, SD=46.15, n=17  
BACHD/Sim1-Cre: M=82.17, SD=48.7, n=23

Dunn's multiple comparisons test:  
WT vs. Sim1-Cre:  $p > 0.9999$   
WT vs. BACHD: p=0.0007  
WT vs. BACHD/Sim1-Cre: p=0.0536  
Sim1-Cre vs. BACHD: p=0.0312  
Sim1-Cre vs. BACHD/Sim1-Cre: p=0.837  
BACHD vs. BACHD/Sim1-Cre: p=0.9463

**C. Females percent time spent at open arms in EPM at 2 months.**



Kruskal-Wallis test:  $p=0.0007$

WT:  $M=14.13$ ,  $SD=6.498$ ,  $n=21$

Sim1-Cre:  $M=16.49$ ,  $SD=7.858$ ,  $n=11$

BACHD:  $M=10.26$ ,  $SD=6.68$ ,  $n=16$

BACHD/Sim1-Cre:  $M=9.916$ ,  $SD=8.085$ ,  $n=18$

Dunn's multiple comparisons test:

WT vs. Sim1-Cre:  $p > 0.9999$

WT vs. BACHD:  $p=0.5226$

WT vs. BACHD/Sim1-Cre:  $p=0.1106$

Sim1-Cre vs. BACHD:  $p=0.1516$

Sim1-Cre vs. BACHD/Sim1-Cre:  $p=0.0322$

BACHD vs. BACHD/Sim1-Cre:  $p > 0.9999$

#### C. Males percent time spent at open arms in EPM at 2 months.

One-way ANOVA,  $F(3, 79) = 4.512$ ,  $p = 0.0057$

WT:  $M=14.76$ ,  $SD=7.725$ ,  $n=23$

Sim1-Cre:  $M=19.34$ ,  $SD=13.3$ ,  $n=18$

BACHD:  $M=7.409$ ,  $SD=5.112$ ,  $n=13$

BACHD/Sim1-Cre:  $M=13.86$ ,  $SD=7.785$ ,  $n=29$

Tukey's multiple comparisons test:

WT vs. Sim1-Cre:  $p=0.3709$

WT vs. BACHD:  $p=0.092$

WT vs. BACHD/Sim1-Cre:  $p=0.9838$

Sim1-Cre vs. BACHD:  $p=0.0025$

Sim1-Cre vs. BACHD/Sim1-Cre:  $p=0.1824$

BACHD vs. BACHD/Sim1-Cre:  $p=0.1439$

#### D. Females percent time spent at open arms in EPM at 8 months.

Kruskal-Wallis test:  $p=0.0961$

WT:  $M=11.63$ ,  $SD=5.562$ ,  $n=18$

Sim1-Cre:  $M=19.21$ ,  $SD=17.41$ ,  $n=15$

BACHD:  $M=9.075$ ,  $SD=9.707$ ,  $n=17$

BACHD/Sim1-Cre:  $M=7.521$ ,  $SD=5.599$ ,  $n=22$

Dunn's multiple comparisons test:

WT vs. Sim1-Cre:  $p > 0.9999$

WT vs. BACHD:  $p=0.8498$

WT vs. BACHD/Sim1-Cre:  $p=0.3154$

Sim1-Cre vs. BACHD:  $p=0.7247$

Sim1-Cre vs. BACHD/Sim1-Cre:  $p=0.2751$

BACHD vs. BACHD/Sim1-Cre:  $p > 0.9999$

**D. Males percent time spent at open arms in EPM at 8 months.**

One-way ANOVA,  $F(3, 73) = 5.604$ ,  $p = 0.0016$

WT:  $M=15.78$ ,  $SD=9.036$ ,  $n=17$

Sim1-Cre:  $M=19.25$ ,  $SD=14.54$ ,  $n=20$

BACHD:  $M=8.133$ ,  $SD=6.055$ ,  $n=17$

BACHD/Sim1-Cre:  $M=9.214$ ,  $SD=7.484$ ,  $n=23$

Tukey's multiple comparisons test:

WT vs. Sim1-Cre:  $p=0.7138$

WT vs. BACHD:  $p=0.1183$

WT vs. BACHD/Sim1-Cre:  $p=0.1704$

Sim1-Cre vs. BACHD:  $p=0.0058$

Sim1-Cre vs. BACHD/Sim1-Cre:  $p=0.0076$

BACHD vs. BACHD/Sim1-Cre:  $p=0.9862$

**E. Females number of open arms entries in EPM at 2 months.**

One-way ANOVA,  $F(3, 62) = 1.003$ ,  $p = 0.3977$

WT:  $M=11.33$ ,  $SD=4.63$ ,  $n=21$

Sim1-Cre:  $M=14.36$ ,  $SD=7.229$ ,  $n=11$

BACHD:  $M=11.75$ ,  $SD=4.171$ ,  $n=16$

BACHD/Sim1-Cre:  $M=10.94$ ,  $SD=6.15$ ,  $n=18$

Tukey's multiple comparisons test:

WT vs. Sim1-Cre:  $p=0.4506$

WT vs. BACHD:  $p=0.9957$

WT vs. BACHD/Sim1-Cre:  $p=0.9961$

Sim1-Cre vs. BACHD:  $p=0.6167$

Sim1-Cre vs. BACHD/Sim1-Cre:  $p=0.3678$

BACHD vs. BACHD/Sim1-Cre:  $p=0.9734$

**E. Males number of open arms entries in EPM at 2 months.**

Kruskal-Wallis test:  $p=0.0829$

WT:  $M=11.91$ ,  $SD=5.954$ ,  $n=23$

Sim1-Cre:  $M=16.56$ ,  $SD=13.48$ ,  $n=18$

BACHD:  $M=8.538$ ,  $SD=6.359$ ,  $n=13$

BACHD/Sim1-Cre:  $M=12$ ,  $SD=7.502$ ,  $n=29$

Dunn's multiple comparisons test:

WT vs. Sim1-Cre:  $p > 0.9999$

WT vs. BACHD:  $p=0.539$

WT vs. BACHD/Sim1-Cre:  $p > 0.9999$

Sim1-Cre vs. BACHD:  $p=0.0618$

Sim1-Cre vs. BACHD/Sim1-Cre:  $p=0.9094$

BACHD vs. BACHD/Sim1-Cre:  $p=0.7878$

**F. Females number of open arms entries in EPM at 8 months.**

Kruskal-Wallis test:  $p= 0.5694$

WT:  $M=9.333$ ,  $SD=4.27$ ,  $n=18$

Sim1-Cre:  $M=14.2$ ,  $SD=13.89$ ,  $n=15$

BACHD:  $M=10.24$ ,  $SD=10.59$ ,  $n=17$

BACHD/Sim1-Cre:  $M=7.727$ ,  $SD=5.742$ ,  $n=22$

Dunn's multiple comparisons test:

WT vs. Sim1-Cre:  $p> 0.9999$

WT vs. BACHD:  $p> 0.9999$

WT vs. BACHD/Sim1-Cre:  $p> 0.9999$

Sim1-Cre vs. BACHD:  $p> 0.9999$

Sim1-Cre vs. BACHD/Sim1-Cre:  $p> 0.9999$

BACHD vs. BACHD/Sim1-Cre:  $p> 0.9999$

**F. Males number of open arms entries in EPM at 8 months.**

Kruskal-Wallis test:  $p= 0.2105$

WT:  $M=11.76$ ,  $SD=8.772$ ,  $n=17$

Sim1-Cre:  $M=13.45$ ,  $SD=9.099$ ,  $n=20$

BACHD:  $M=9.588$ ,  $SD=10.93$ ,  $n=17$

BACHD/Sim1-Cre:  $M=8.391$ ,  $SD=5.711$ ,  $n=23$

Dunn's multiple comparisons test:

WT vs. Sim1-Cre:  $p> 0.9999$

WT vs. BACHD:  $p> 0.9999$

WT vs. BACHD/Sim1-Cre:  $p> 0.9999$

Sim1-Cre vs. BACHD:  $p=0.4641$

Sim1-Cre vs. BACHD/Sim1-Cre:  $p=0.5189$

BACHD vs. BACHD/Sim1-Cre:  $p> 0.9999$

**Figure 4.** Assessment of the hypothalamic-pituitary-gonadal axis in male mice at 8 months.

**A. Stereological quantification of GnRH positive cells in AHA**

One-way ANOVA,  $F(3, 19) = 4.616$ ,  $p = 0.0137$

WT:  $M=211.2$ ,  $SD=75.23$ ,  $n=5$

Sim1-Cre:  $M=225.6$ ,  $SD=49.77$ ,  $n=5$

BACHD:  $M=111.4$ ,  $SD=35.13$ ,  $n=7$

BACHD/Sim1-Cre:  $M=150$ ,  $SD=76.18$ ,  $n=6$

Tukey's multiple comparisons test:

WT vs. Sim1-Cre:  $p=0.9811$

WT vs. BACHD:  $p=0.0484$   
WT vs. BACHD/Sim1-Cre:  $p=0.3621$   
Sim1-Cre vs. BACHD:  $p=0.0207$   
Sim1-Cre vs. BACHD/Sim1-Cre:  $p=0.1978$   
BACHD vs. BACHD/Sim1-Cre:  $p=0.6638$

#### A. Stereological quantification of GnRH positive cells in rPOA

One-way ANOVA,  $F(3, 19) = 2.802$ ,  $p = 0.0677$   
WT:  $M=288$ ,  $SD=55.64$ ,  $n=5$   
Sim1-Cre:  $M=340.8$ ,  $SD=46.16$ ,  $n=5$   
BACHD:  $M=241.7$ ,  $SD=47.21$ ,  $n=7$   
BACHD/Sim1-Cre:  $M=308$ ,  $SD=85.08$ ,  $n=6$

Tukey's multiple comparisons test:  
WT vs. Sim1-Cre:  $p=0.5318$   
WT vs. BACHD:  $p=0.5753$   
WT vs. BACHD/Sim1-Cre:  $p=0.9475$   
Sim1-Cre vs. BACHD:  $p=0.0535$   
Sim1-Cre vs. BACHD/Sim1-Cre:  $p=0.8104$   
BACHD vs. BACHD/Sim1-Cre:  $p=0.239$

#### A. Stereological quantification of GnRH positive cells in MS

Kruskal-Wallis test:  $p=0.772$   
WT:  $M=285.6$ ,  $SD=81.12$ ,  $n=5$   
Sim1-Cre:  $M=278.4$ ,  $SD=52.58$ ,  $n=5$   
BACHD:  $M=267.4$ ,  $SD=69.87$ ,  $n=7$   
BACHD/Sim1-Cre:  $M=244$ ,  $SD=92.23$ ,  $n=6$

Dunn's multiple comparisons test:  
WT vs. Sim1-Cre:  $p > 0.9999$   
WT vs. BACHD:  $p > 0.9999$   
WT vs. BACHD/Sim1-Cre:  $p > 0.9999$   
Sim1-Cre vs. BACHD:  $p > 0.9999$   
Sim1-Cre vs. BACHD/Sim1-Cre:  $p > 0.9999$   
BACHD vs. BACHD/Sim1-Cre:  $p > 0.9999$

#### C. Serum testosterone level measurement

Kruskal-Wallis test:  $p=0.1469$   
WT:  $M=1.178$ ,  $SD=2.681$ ,  $n=9$   
Sim1-Cre:  $M=2.337$ ,  $SD=4.683$ ,  $n=9$   
BACHD:  $M=1.077$ ,  $SD=2.433$ ,  $n=10$   
BACHD/Sim1-Cre:  $M=1.11$ ,  $SD=2.266$ ,  $n=11$

Dunn's multiple comparisons test:

WT vs. Sim1-Cre:  $p > 0.9999$   
WT vs. BACHD:  $p > 0.9999$   
WT vs. BACHD/Sim1-Cre:  $p = 0.1254$   
Sim1-Cre vs. BACHD:  $p > 0.9999$   
Sim1-Cre vs. BACHD/Sim1-Cre:  $p > 0.9999$   
BACHD vs. BACHD/Sim1-Cre:  $p > 0.9999$

#### D. Testis weight measurement

Kruskal-Wallis test:  $p = 0.0139$   
WT:  $M = 0.2478$ ,  $SD = 0.02172$ ,  $n = 15$   
Sim1-Cre:  $M = 0.2477$ ,  $SD = 0.009956$ ,  $n = 8$   
BACHD:  $M = 0.2664$ ,  $SD = 0.02087$ ,  $n = 8$   
BACHD/Sim1-Cre:  $M = 0.2428$ ,  $SD = 0.01504$ ,  $n = 15$

Dunn's multiple comparisons test:  
WT vs. Sim1-Cre:  $p > 0.9999$   
WT vs. BACHD:  $p = 0.0467$   
WT vs. BACHD/Sim1-Cre:  $p > 0.9999$   
Sim1-Cre vs. BACHD:  $p = 0.1196$   
Sim1-Cre vs. BACHD/Sim1-Cre:  $p > 0.9999$   
BACHD vs. BACHD/Sim1-Cre:  $p = 0.0106$

**Supplementary Figure 1:** The number of oxytocin and vasopressin positive neurons in the PVN.

#### A. Females oxytocin positive cells in the PVN

Kruskal-Wallis test:  $p = 0.8077$   
WT:  $M = 1368$ ,  $SD = 146.6$ ,  $n = 4$   
Sim1-Cre:  $M = 1392$ ,  $SD = 162$ ,  $n = 4$   
BACHD:  $M = 1305$ ,  $SD = 62.45$ ,  $n = 4$   
BACHD/Sim1-Cre:  $M = 1335$ ,  $SD = 121.2$ ,  $n = 4$

Dunn's multiple comparisons test:  
WT vs. Sim1-Cre:  $p > 0.9999$   
WT vs. BACHD:  $p > 0.9999$   
WT vs. BACHD/Sim1-Cre:  $p > 0.9999$   
Sim1-Cre vs. BACHD:  $p > 0.9999$   
Sim1-Cre vs. BACHD/Sim1-Cre:  $p > 0.9999$   
BACHD vs. BACHD/Sim1-Cre:  $p > 0.9999$

#### A. Males oxytocin positive cells in the PVN

Kruskal-Wallis test:  $p = 0.3185$   
WT:  $M = 1437$ ,  $SD = 172.8$ ,  $n = 4$   
Sim1-Cre:  $M = 1325$ ,  $SD = 122.9$ ,  $n = 4$   
BACHD:  $M = 1235$ ,  $SD = 115.6$ ,  $n = 6$   
BACHD/Sim1-Cre:  $M = 1367$ ,  $SD = 246.4$ ,  $n = 7$

Dunn's multiple comparisons test:  
WT vs. Sim1-Cre:  $p > 0.9999$   
WT vs. BACHD:  $p = 0.461$   
WT vs. BACHD/Sim1-Cre:  $p > 0.9999$   
Sim1-Cre vs. BACHD:  $p > 0.9999$   
Sim1-Cre vs. BACHD/Sim1-Cre:  $p > 0.9999$   
BACHD vs. BACHD/Sim1-Cre:  $p > 0.9999$

**B. Females vasopressin positive cells in the PVN**

Kruskal-Wallis test:  $p = 0.0440$   
WT:  $M = 668.1$ ,  $SD = 38.41$ ,  $n = 4$   
Sim1-Cre:  $M = 806$ ,  $SD = 81.39$ ,  $n = 4$   
BACHD:  $M = 645.5$ ,  $SD = 81.23$ ,  $n = 4$   
BACHD/Sim1-Cre:  $M = 684.6$ ,  $SD = 88.25$ ,  $n = 4$

Dunn's multiple comparisons test:  
WT vs. Sim1-Cre:  $p = 0.0934$   
WT vs. BACHD:  $p = 0.9731$   
WT vs. BACHD/Sim1-Cre:  $p = 0.989$   
Sim1-Cre vs. BACHD:  $p = 0.0453$   
Sim1-Cre vs. BACHD/Sim1-Cre:  $p = 0.155$   
BACHD vs. BACHD/Sim1-Cre:  $p = 0.8807$

**B. Males vasopressin positive cells in the PVN**

Kruskal-Wallis test:  $p = 0.8273$   
WT:  $M = 702.6$ ,  $SD = 121.7$ ,  $n = 4$   
Sim1-Cre:  $M = 696.6$ ,  $SD = 63.36$ ,  $n = 4$   
BACHD:  $M = 659.5$ ,  $SD = 55.61$ ,  $n = 6$   
BACHD/Sim1-Cre:  $M = 694$ ,  $SD = 101.2$ ,  $n = 7$

Dunn's multiple comparisons test:  
WT vs. Sim1-Cre:  $p > 0.9999$   
WT vs. BACHD:  $p > 0.9999$   
WT vs. BACHD/Sim1-Cre:  $p > 0.9999$   
Sim1-Cre vs. BACHD:  $p > 0.9999$   
Sim1-Cre vs. BACHD/Sim1-Cre:  $p > 0.9999$   
BACHD vs. BACHD/Sim1-Cre:  $p > 0.9999$

**Supplementary Table 1:** Hypothalamic gene expression analysis in male mice at 8 months.

**Brn 2:** One-way ANOVA,  $F(3, 30) = 0.9572$ ,  $p = 0.4256$   
WT:  $M = 0.9989$ ,  $SD = 0.09048$ ,  $n = 9$   
Sim1-Cre:  $M = 1.098$ ,  $SD = 0.13$ ,  $n = 6$   
BACHD:  $M = 1.133$ ,  $SD = 0.2446$ ,  $n = 9$

BACHD/Sim1-Cre: M=1.091, SD=0.1797, n=10

Tukey's multiple comparisons test:

WT vs. Sim1-Cre: p=0.7799

WT vs. BACHD: p=0.5155

WT vs. BACHD/Sim1-Cre: p=0.7799

Sim1-Cre vs. BACHD: p=0.9372

Sim1-Cre vs. BACHD/Sim1-Cre: p=0.9372

BACHD vs. BACHD/Sim1-Cre: p=0.9372

**Sim1:** Kruskal-Wallis test: p=0.9065

WT: M=1, SD=0.1156, n=9

Sim1-Cre: M=1.0385, SD=0.1804, n=6

BACHD: M=1.0976, SD=0.3506, n=9

BACHD/Sim1-Cre: M=1.1028, SD=0.2478, n=10

Dunn's multiple comparisons test

WT vs. Sim1-Cre: p> 0.9999

WT vs. BACHD: p> 0.9999

WT vs. BACHD/Sim1-Cre: p> 0.9999

Sim1-Cre vs. BACHD: p> 0.9999

Sim1-Cre vs. BACHD/Sim1-Cre: p> 0.9999

BACHD vs. BACHD/Sim1-Cre: p> 0.9999

**Oxy:** One-way ANOVA, F (3, 30) = 0.5381, p = 0.6598

WT: M=1, SD=0.1098, n=9

Sim1-Cre: M=0.9367, SD=0.2229, n=6

BACHD: M=0.8733, SD=0.3733, n=9

BACHD/Sim1-Cre: M=0.999, SD=0.2086, n=10

Tukey's multiple comparisons test:

WT vs. Sim1-Cre: p=0.9814

WT vs. BACHD: p=0.8603

WT vs. BACHD/Sim1-Cre: p=0.9931

Sim1-Cre vs. BACHD: p=0.9814

Sim1-Cre vs. BACHD/Sim1-Cre: p=0.9814

BACHD vs. BACHD/Sim1-Cre: p=0.8603

**Avp:** Kruskal-Wallis test: p=0.1923

WT: M=1, SD=0.6461, n=9

Sim1-Cre: M=0.7733, SD=0.3983, n=6

BACHD: M=0.5378, SD=0.1995, n=9

BACHD/Sim1-Cre: M=0.677, SD=0.2993, n=10

Dunn's multiple comparisons test:

WT vs. Sim1-Cre:  $p > 0.9999$   
WT vs. BACHD:  $p = 0.2366$   
WT vs. BACHD/Sim1-Cre:  $p = 0.5856$   
Sim1-Cre vs. BACHD:  $p > 0.9999$   
Sim1-Cre vs. BACHD/Sim1-Cre:  $p > 0.9999$   
BACHD vs. BACHD/Sim1-Cre:  $p > 0.9999$

**SST:** Kruskal-Wallis test:  $p = 0.0512$

WT:  $M = 1$ ,  $SD = 0.3597$ ,  $n = 9$   
Sim1-Cre:  $M = 0.8533$ ,  $SD = 0.2982$ ,  $n = 6$   
BACHD:  $M = 0.7356$ ,  $SD = 0.1153$ ,  $n = 9$   
BACHD/Sim1-Cre:  $M = 0.712$ ,  $SD = 0.1377$ ,  $n = 10$

Dunn's multiple comparisons test:

WT vs. Sim1-Cre:  $p > 0.9999$   
WT vs. BACHD:  $p = 0.1763$   
WT vs. BACHD/Sim1-Cre:  $p = 0.0583$   
Sim1-Cre vs. BACHD:  $p > 0.9999$   
Sim1-Cre vs. BACHD/Sim1-Cre:  $p > 0.9999$   
BACHD vs. BACHD/Sim1-Cre:  $p > 0.9999$

**GHRH:** Kruskal-Wallis test:  $p = 0.0747$

WT:  $M = 1$ ,  $SD = 0.2831$ ,  $n = 9$   
Sim1-Cre:  $M = 0.7567$ ,  $SD = 0.4071$ ,  $n = 6$   
BACHD:  $M = 0.7778$ ,  $SD = 0.1021$ ,  $n = 9$   
BACHD/Sim1-Cre:  $M = 0.742$ ,  $SD = 0.1623$ ,  $n = 10$

Dunn's multiple comparisons test:

WT vs. Sim1-Cre:  $p = 0.0841$   
WT vs. BACHD:  $p = 0.6134$   
WT vs. BACHD/Sim1-Cre:  $p = 0.3277$   
Sim1-Cre vs. BACHD:  $p > 0.9999$   
Sim1-Cre vs. BACHD/Sim1-Cre:  $p > 0.9999$   
BACHD vs. BACHD/Sim1-Cre:  $p > 0.9999$
